# Supplementary material
Source: PubMed Central journal article supplement (PMC4135730)
Supplement: EC.00060-14_zek999094299so1.pdf [file EC.00060-14_zek999094299so1.pdf]

1 **Supplemental material**

2

3

4 **Supplemental MATERIALS AND METHODS**

5

6 **Southern blot analysis.** Southern blot analysis was performed using a probe  
7 amplified with the primers (attB4)Aolah-up-F and (attB1)Aolah-up-R for verification of  
8 *Aolah* gene disruption. For confirmation of *Aowsc* gene disruption, Southern blot  
9 analysis was performed using a probe amplified with the primers (attB4)Aowsc-up-F  
10 and (attB1)Aowsc-up-R. After electrophoresis, genomic DNAs digested with restriction  
11 enzymes *EcoT22I* or *ApaI* were transferred onto Hybond N+ membrane (GE Healthcare,  
12 Buckinghamshire, UK). The ECL (enhanced chemiluminescence) Direct Nucleic Acid  
13 Labeling and Detection system (GE Healthcare) and a LAS-1000plus luminescent  
14 image analyzer (Fuji Photo Film, Tokyo, Japan) were used for detection.

15

16 **Protein extraction and Western blot analysis** The *A. oryzae* strains expressing  
17 full-length AoLAH (AoLAH-3×HA) or middle-region deleted AoLAH  
18 (AoLAH[(1-2039)+(4710-5727)]-3×HA) were grown in DPY liquid nutrient medium as  
19 shaking cultures for 24 h at 30°C. Cell extracts were prepared by homogenizing the  
20 mycelia using liquid nitrogen in an elution buffer (50 mM Tris/HCl, pH 7.5, 1 mM  
21 PMSF, and 1:100 protease inhibitor cocktail [Sigma-Aldrich, St. Louis, MO]). Total cell  
22 lysates were centrifuged at 500×g for 3 min to remove cell debris, and the obtained  
23 supernatants were further centrifuged (10,000×g, 10 min, 4°C). The resulting pellet  
24 fraction was used for detection of middle-region deleted AoLAH. To prepare a fraction

25 highly enriched with Woronin body proteins, the 10,000×g pellet fraction was  
26 re-suspended in the elution buffer supplemented with 0.5% Triton X-100, and then  
27 centrifuged at 20,000×g, 4°C for 10 min, of which the pellet fraction was used for  
28 detection of full-length AoLAH. The pellet fractions were dissolved in sampling buffer  
29 and analyzed by Western blotting. NuPAGE® Novex 3%-8% Tris-Acetate Gel,  
30 NuPAGE®LDS Sample Buffer (4X), and HiMark™ Pre-Stained Protein marker  
31 (Invitrogen Life Technologies, Carlsbad, CA) were used for Western blotting analysis.  
32 The primary antibodies used was mouse anti-HA monoclonal antibody (12CA5; Roche,  
33 Mannheim, Germany), and the secondary was peroxidase-conjugated anti-mouse  
34 antibody (Vector Laboratories, Burlingame, CA). Protein bands were detected and  
35 analyzed by the ECL detection reagents (Pierce, Rockford, IL) and a LAS-1000plus  
36 luminescent image analyzer.

37 **Table S1** Primers used in this study

| 38 | Name                  | Sequence (5'-3')                                               |
|----|-----------------------|----------------------------------------------------------------|
| 39 | (attB4)Aolah-up-F     | GGGGACAAC TTTGTATAGAAAAGTTGGGAGGATTGCCTCCGCATACAATAC           |
| 40 | (attB1)Aolah-up-R     | GGGGACTGCTTTTTTGTACAAACTTGGCCTTGATCGCTCTCTGCCCACT              |
| 41 | (attB2)Aolah-down-F_2 | GGGGACAGCTTTCTTGTACAAAGTGGGATGACTATGATGACTGCCAACATCTCC         |
| 42 | (attB3)Aolah-down-R_2 | GGGGACAAC TTTGTATAATAAAAGTTGCGATATGGAACCGATTCAAAGTCAACTCC      |
| 43 | (attB1) Aolah_1-F     | GGGGACAAGTTTGTACAAAAAAGCAGGCTTGATGTTTAAGGCCTTATTGGCCGGGGCCGT   |
| 44 | (attB2) Aolah_6243-R  | GGGGACCACTTTGTACAAGAAAGCTGGGTCTCCAGCCC GCCATCGTCTTTTACACCGA    |
| 45 | Aolah-Cter-F (14254)  | GGGGACAAGTTTGTACAAAAAAGCAGGCTATGGAATGGCCTTTGATAGATTGGGAGAAGGAA |
| 46 | Aolah-Cter-R (17400)  | GGGGACCACTTTGTACAAGAAAGCTGGGTCAATCACATTGCTCATGTCCATGGTTCGACGA  |
| 47 | Aolah_N-R-fusion      | TATCAAAGGCCATTCCTCCAGCCC GCCATCGTCTTTTACACCGAC                 |
| 48 | Aolah_C-F-fusion      | GATGGCGGGCTGGAGGAATGGCCTTTGATAGATTGGGAGAAGGAA                  |
| 49 | (attB4) Aowsc-up-F    | GGGGACAAC TTTGTATAGAAAAGTTGAGATGAGAGCATAGCGCGGTACC             |
| 50 | (attB1) Aowsc-up-R    | GGGGACTGCTTTTTTGTACAAACTTGGATGGCGGTTGATGCGGTTGCGT              |
| 51 | (attB2) Aowsc-down-F  | GGGGACAGCTTTCTTGTACAAAGTGGATAGCGTTACGACCAACGTCGCG              |
| 52 | (attB3) Aowsc-down-R  | GGGGACAAC TTTGTATAATAAAAGTTGTGCCTCCAAGAGGCGAAAGTCAGT           |
| 53 | (attB1)-DsRed-M-F     | GGGGACAAGTTTGTACAAAAAAGCAGGCTCTATGGACAACACCGAGGACGTCATC        |
| 54 | (attB2)-PTS1-R        | GGGGACCACTTTGTACAAGAAAGCTGGGTT CATAATTTGGACTGGGAGCCGGAGTGGCG   |

55

56

57

58 **Supplemental figure legends**

59

60 **FIG. S1** Amino acid sequence alignment of N-terminal regions from *Aspergillus* LAH  
61 proteins. Based on comparison with other LAH proteins, the *Aolah* gene was  
62 re-predicted to contain additional 1,198 amino acids at N-terminus (indicated by an  
63 arrow) of the original ORF AO090011000895 from the *A. oryzae* genome database  
64 (DOGAN: Database of the Genomes Analyzed at NITE [National Institute of  
65 Technology and Evaluation, Japan]; <http://www.bio.nite.go.jp/dogan/Top>). Amino acid  
66 sequence data of LAH proteins from *A. fumigatus* (AfLAH) and *A. nidulans* (AnLAH)  
67 were taken from the *Aspergillus* Genome Database (AspGD; <http://www.aspgd.org/>).

68

69 **FIG. S2** Amino acid sequences of poly-lysine regions in the middle region of LAH  
70 proteins.

71

72 **FIG. S3** Southern blot analysis of the *Aolah* disruptant. Genomic DNAs of the parent  
73 strain (NSRku70-1-1; P) and *Aolah* disruptant (NSK- $\Delta$ lah2;  $\Delta$ ) were digested with  
74 *Eco*T22I, and then subjected to Southern blot analysis. Filled bars indicate the used  
75 probe.

76

77 **FIG. S4** Domain prediction of WSC proteins. Amino acid sequence data of WSC  
78 proteins from *A. fumigatus* and *A. nidulans* were taken from the *Aspergillus* Genome  
79 Database (AspGD; <http://www.aspgd.org/>). SMART (<http://smart.embl-heidelberg.de/>)  
80 was used for prediction of domains. ClustalW program  
81 (<http://www.genome.jp/tools/clustalw/>) was used for the sequence identity analysis.

82

83 **FIG. S5** Southern blot analysis of the *Aowsc* disruptant. Genomic DNAs of the parent  
84 strain (NSRku70-1-1; P) and *Aowsc* disruptant (NSK- $\Delta$ wsc1;  $\Delta$ ) were digested with  
85 *ApaI*, and then subjected to Southern blot analysis (lower). Filled bars indicate the used  
86 probe.

87

88 **FIG. S6** Western blot analysis of full length (A) and middle-region deleted (B) AoLAHs.  
89 Arrowheads indicate the bands corresponding to each protein. Lanes: C, wild-type  
90 control strain (NSRku70-1-1A); FL, AoLAH full-length expressing strain;  $\Delta$ M: strain  
91 expressing middle-region deleted AoLAH.

92

93 **FIG. S7** Disorder prediction analysis for AoLAH. The disorder probability of AoLAH  
94 was predicted by PrDOS (Protein DisOrder prediction System;  
95 <http://prdos.hgc.jp/cgi-bin/top.cgi>). The plot of disorder probability of each residue  
96 along the sequence is shown. Residues beyond the black threshold line in this plot are  
97 predicted to be disordered. Note that most of the AoLAH N-terminal and middle regions  
98 is predicted to be disordered, and that part of the AoLAH C-terminal region is predicted  
99 to be ordered.

100

101 **FIG. S8** Amino acid content of the middle region of LAH protein. The amino acid  
102 content of the LAH proteins was calculated and the three most abundant amino acids are  
103 listed. Important amino acids are highlighted by different colors; E and K are  
104 highlighted by green and red, respectively.

105

106 **Supplemental Video S1** Time-lapse movie of Woronin body localization in the  
107 wild-type strain. Woronin bodies were visualized by expressing AoLAH[1-2039]-EGFP  
108 and asterisks indicate the septum.

109

110 **Supplemental Video S2** Time-lapse movie of Woronin body localization in the *Aolah*  
111 disruptant. Woronin bodies were visualized by expressing AoLAH[1-2039]-EGFP and  
112 asterisks indicate the septum.

113

114 **Supplemental Video S3** Time-lapse movie of Woronin bodies tethered to the septum in  
115 strain expressing full-length AoLAH. Woronin bodies were visualized by expressing  
116 AoLAH[1-2039]-EGFP.

117

118 **Supplemental Video S4** Time-lapse movie of Woronin bodies tethered to the septum in  
119 strain expressing middle-region deleted AoLAH. Woronin bodies were visualized by  
120 expressing AoLAH[1-2039]-EGFP.



| <b><i>A. oryzae</i></b> |            |      | <b><i>A. fumigatus</i></b> |            |      | <b><i>A. nidulans</i></b> |            |      |
|-------------------------|------------|------|----------------------------|------------|------|---------------------------|------------|------|
| <b>AoLAH</b>            |            |      | <b>LAH</b>                 |            |      | <b>LAH</b>                |            |      |
| 2316                    | KKKKKDKKKK | 2325 | 2345                       | KKKKKKNKKK | 2354 | 2670                      | SKKAKKKKKK | 2679 |
| 2945                    | KKGKKKKKNR | 2954 | 2473                       | KKSJKKKKKK | 2482 | 2823                      | KASKKKKKNK | 2832 |
| 3067                    | KKNKKKKKKK | 3076 | 2738                       | KKNKKKNKRK | 2747 | 2988                      | KKSJKKNKKK | 2997 |
| 3155                    | KKKTKEQKK  | 3164 | 2874                       | KKKAKKKKNR | 2883 | 3272                      | KNAKKKKKKK | 3281 |
| 3491                    | KKDKKKKKKQ | 3500 | 3003                       | KKSJKNNKKK | 3012 | 3445                      | KKKNKKKKKK | 3454 |
| 3593                    | KKKAKKDKKK | 3602 | 3089                       | KKTKEKKKK  | 3098 | 3575                      | KKKVKKDKKK | 3584 |
| 3819                    | KDKKKKKKRK | 3828 | 3330                       | KKKDKKKKKK | 3339 | 3734                      | KKRAKKEKKR | 3743 |
| 3942                    | KKAKKERKR  | 3951 | 3438                       | KKKAKDKKK  | 3447 | 4273                      | KKKNKKAKKQ | 4282 |
| 4443                    | KKQKKAKKQ  | 4452 | 3642                       | KSJKNNKKKK | 3651 | 4443                      | SKKEKKLKK  | 4452 |
|                         |            |      | 3718                       | KKKAKKDKK  | 3727 |                           |            |      |
|                         |            |      | 4246                       | SKKSKKAKK  | 4255 |                           |            |      |

**FIG. S2** Amino acid sequences of poly-lysine regions in the middle region of LAH proteins.



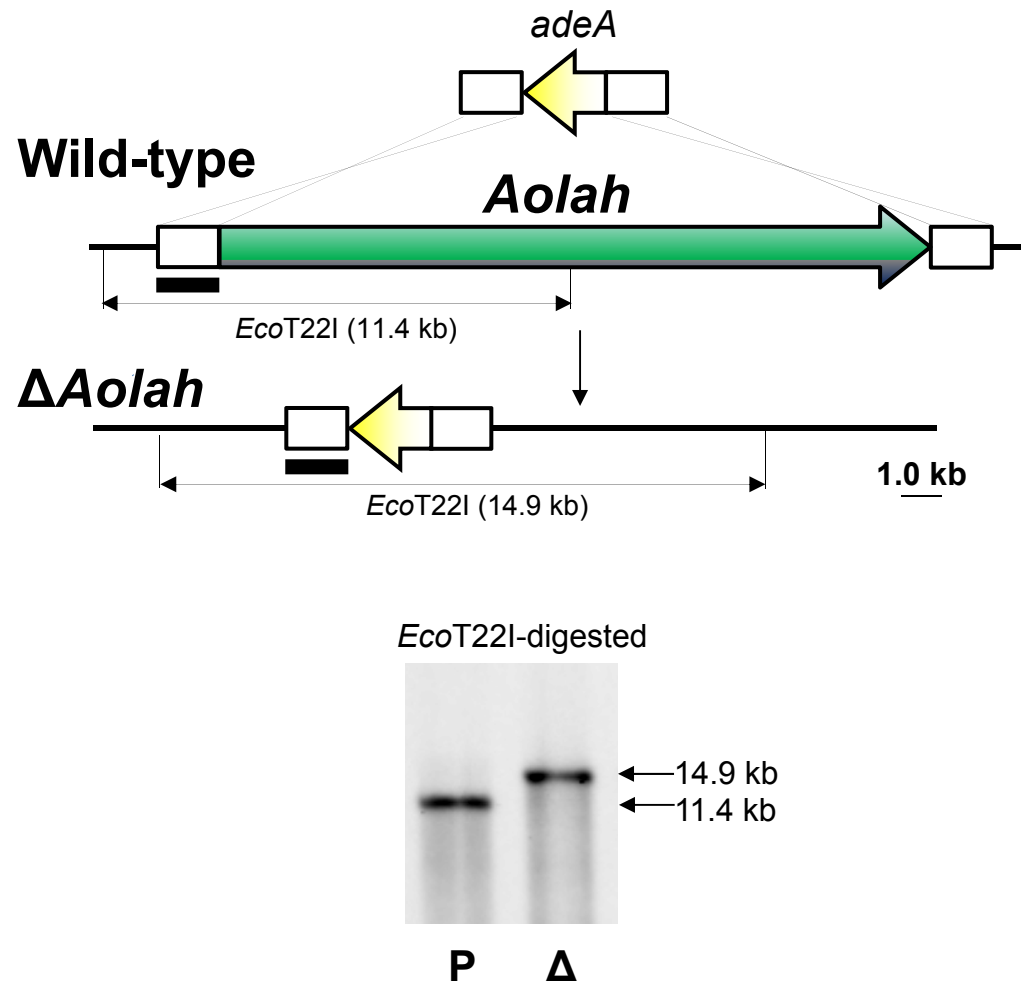

**FIG. S3** Southern blot analysis of the *Aolah* disruptant. Genomic DNAs of the parent strain (NSRku70-1-1; P) and *Aolah* disruptant (NSK- $\Delta lah2$ ;  $\Delta$ ) were digested with *EcoT22I*, and then subjected to Southern blot analysis. Filled bars indicate the used probe.

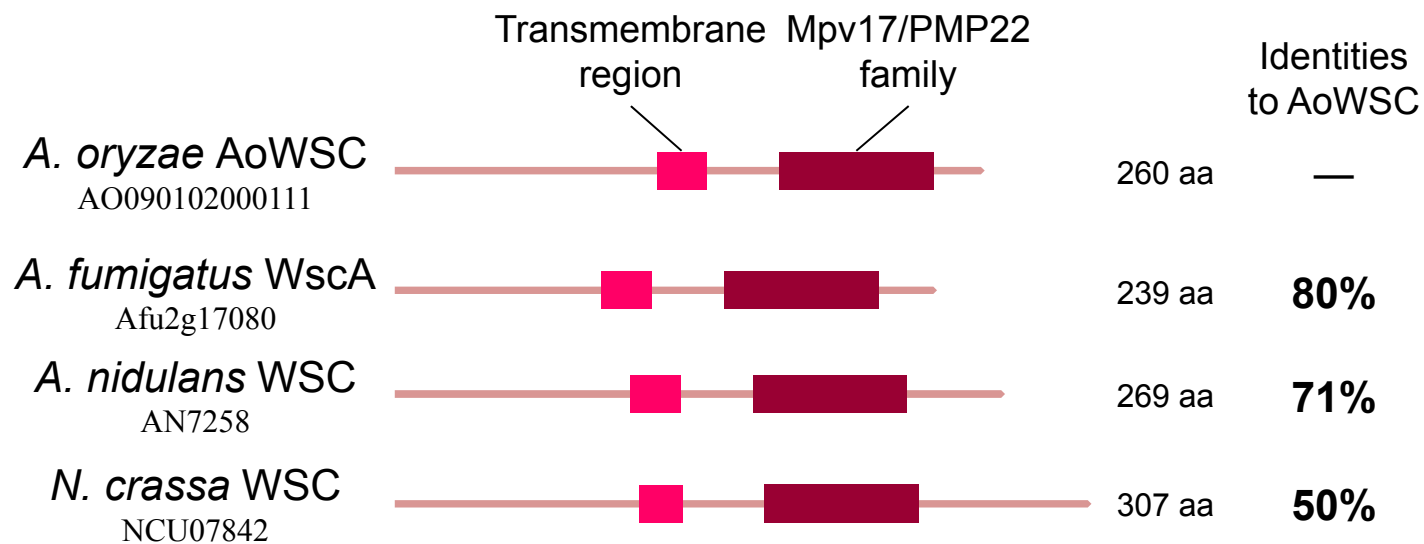

**FIG. S4** Domain prediction of WSC proteins. Amino acid sequence data of WSC proteins from *A. fumigatus* and *A. nidulans* were taken from the *Aspergillus* Genome Database (AspGD; <http://www.aspgd.org/>). SMART (<http://smart.embl-heidelberg.de/>) was used for prediction of domains. ClustalW program (<http://www.genome.jp/tools/clustalw/>) was used for the sequence identity analysis.

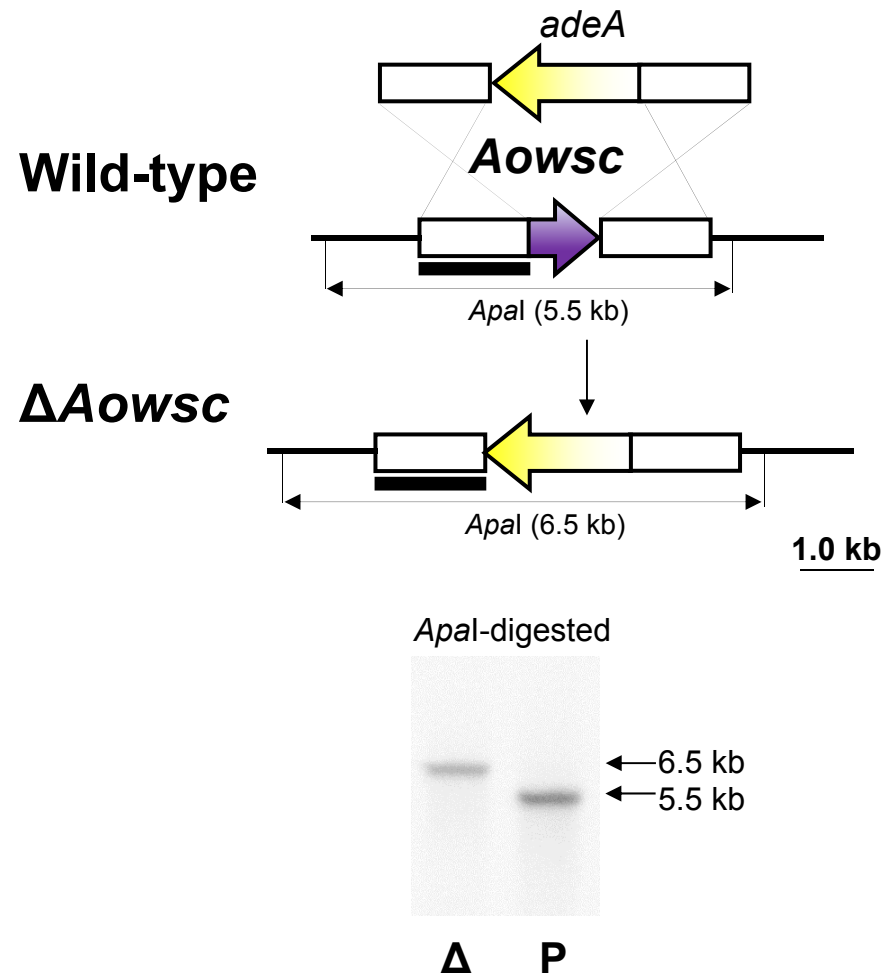

**FIG. S5** Southern blot analysis of the *Aowsc* disruptant. Genomic DNAs of the parent strain (NSRku70-1-1; P) and *Aowsc* disruptant (NSK-Δwsc1; Δ) were digested with *ApaI*, and then subjected to Southern blot analysis (lower). Filled bars indicate the used probe.

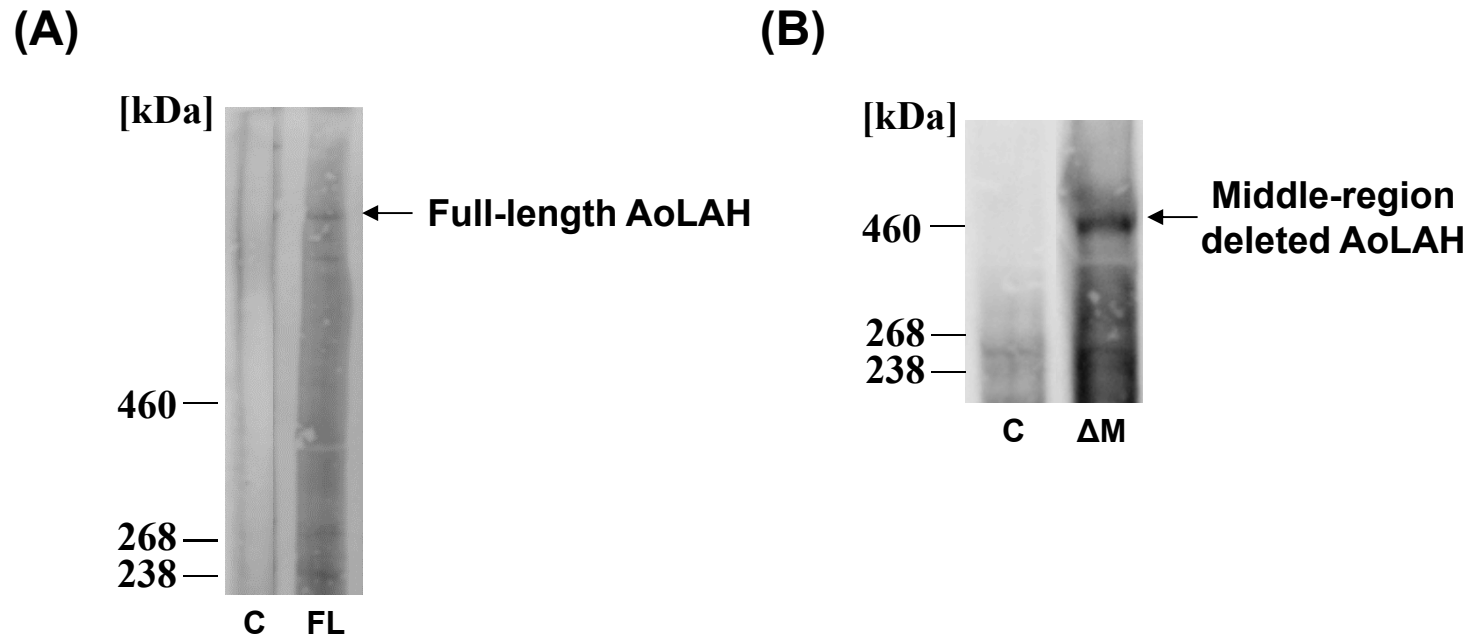

**FIG. S6** Western blot analysis of full length (A) and middle-region deleted (B) AoLAHs. Arrowheads indicate the bands corresponding to each protein. Lanes: C, wild-type control strain (NSRku70-1-1A); FL, AoLAH full-length expressing strain;  $\Delta$ M: strain expressing middle-region deleted AoLAH.

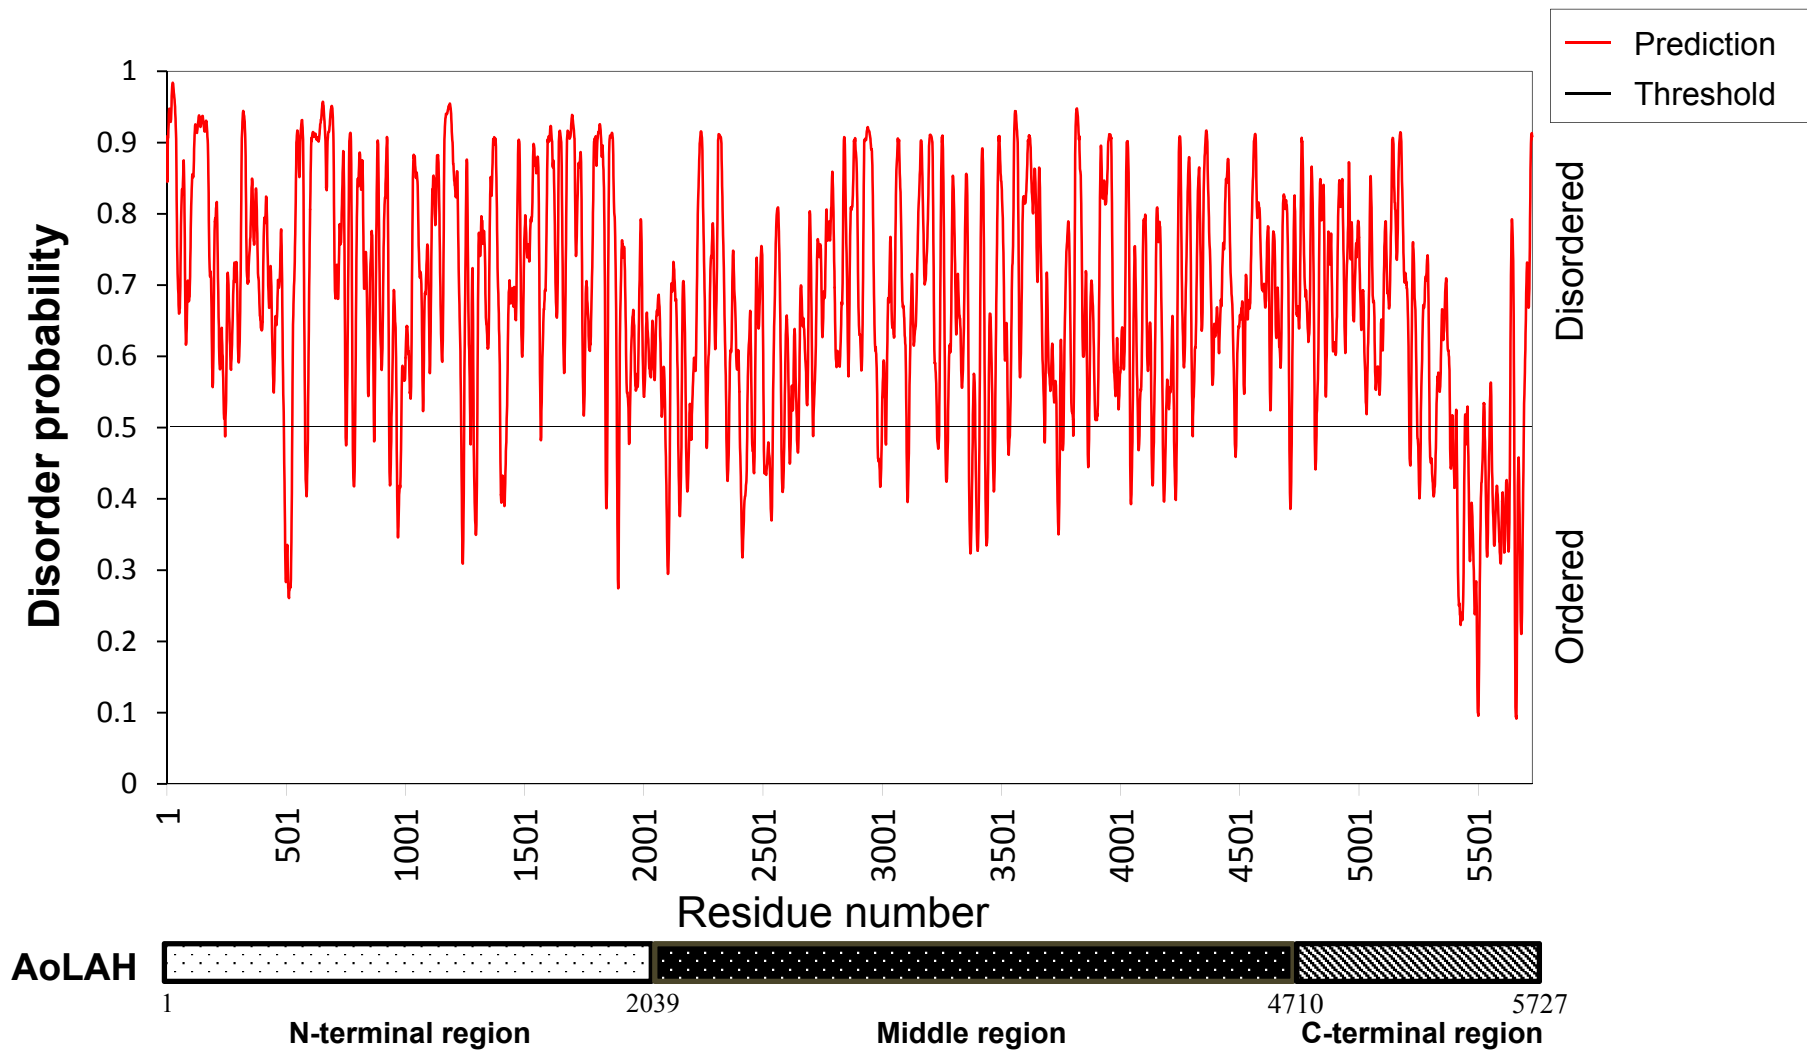

**FIG. S7** Disorder prediction analysis for AoLAH. The disorder probability of AoLAH was predicted by PrDOS (Protein DisOrder prediction System; <http://prdos.hgc.jp/cgi-bin/top.cgi>). The plot of disorder probability of each residue along the sequence is shown. Residues beyond the black threshold line in this plot are predicted to be disordered. Note that most of the AoLAH N-terminal and middle regions is predicted to be disordered, and that part of the AoLAH C-terminal region is predicted to be ordered.
